# Supplementary material for: Transcriptome Analysis Identifies a Gene Cluster for the Biosynthesis of Biruloquinone, a Rare Phenanthraquinone, in a Lichen-Forming Fungus Cladonia macilenta
Source: MDPI journal article supplement (doi:10.3390/jof7050398), 2021-05-20
Supplement: s1 [file s1]

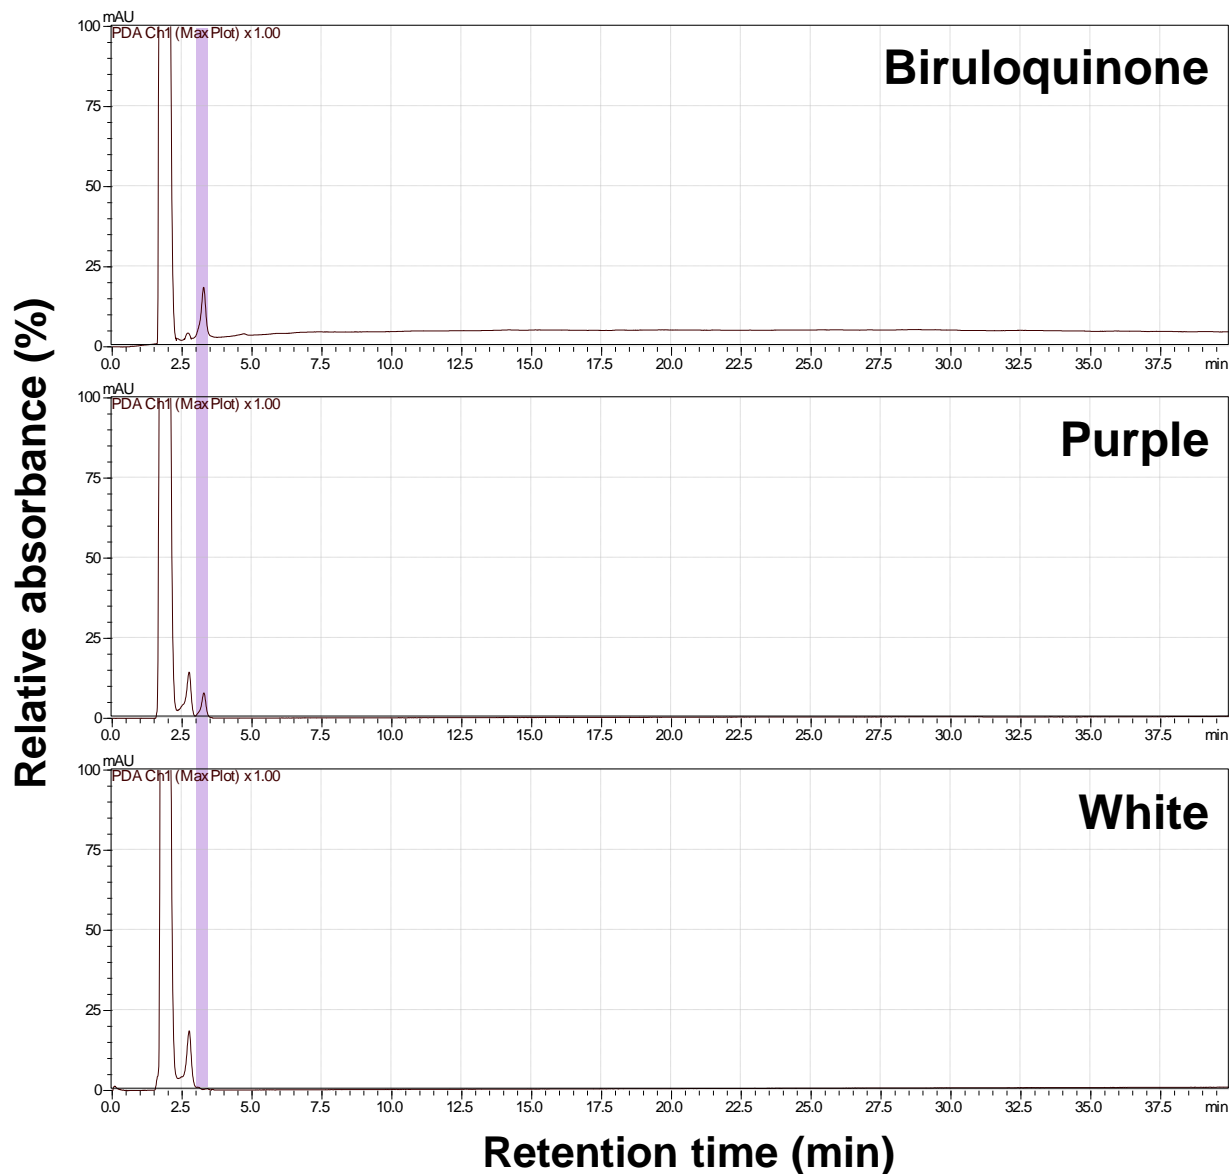

**Supplementary Figure S1. Detection of biruloquinone in lichen-forming fungi (LFF) isolated from *Cladonia macilenta*.** HPLC profiles of acetone extracts of LFF culture of the purple strain (middle panel) and the white strain (lower panel). Upper panel is the chromatogram of purified biruloquinone ( $t_R = 3.26$  min) dissolved in acetone ( $t_R = 1.85$  min).
